# Supplementary material for: Gibberellin Positively Regulates Tomato Resistance to Tomato Yellow Leaf Curl Virus (TYLCV)
Source: MDPI journal article supplement (doi:10.3390/plants13091277), 2024-05-06
Supplement: s1 [file s1]

**Table S1.** Sequence of the primers used in this work.

| Primer                    | Sequence                      |
|---------------------------|-------------------------------|
| ACTIN-F                   | GGAAAAGCTTGCCTATGTGG          |
| ACTIN-R                   | CCTGCAGCTTCCATACC             |
| TYLCV-Q-F                 | TAATCATTTCCACGCCCGTCTC        |
| TYLCV-Q-R                 | CAGTATGCTTAATATCATCCCGTTGCTC  |
| P450 94C1-F               | CGCTTTCGATATCGTCAGTG          |
| P450 94C1-R               | CATGATGGGAAGTCCGCC            |
| MYB117-F                  | ATGTCATCAACATCATCATCTTGTT     |
| MYB117-R                  | TCAAGTGGCTCCTACTCCAA G        |
| MYB20-F                   | ATGGGAAGGCAACCTTGTT           |
| MYB20-R                   | TTAATTGTATTTTCTCAAAAGGAACAAA  |
| MADS-MC-F                 | ATGGGAAGAGGAAAAGTTGAATTA      |
| MADS-MC-R                 | TCATAGATGTTTATTCATGTTGTAAAGTG |
| ABA 3like-F               | ATGGCATCAG AGCAAGAAGA         |
| ABA 3like-R               | TCAAACGTCGTTAACGCCT           |
| MAPKKK 18-like-F          | ATGATCTGGAAAAAGCTTAAGGT       |
| MAPKKK 18-like-R          | TTATCCTCTGAAGTTGCTGTCAC       |
| PR5-F                     | ATGAGTCACTTGACAACTTGTTTAGT    |
| PR5-R                     | TTAAGCAACTTCAAGAGTACTTGTAG    |
| Wound-induced inhibitor-F | ATGGAGTCAAAGTTTGCTCAC         |
| Wound-induced inhibitor-R | TTAAGTCACCACAGGCATTTGTA       |
